# Supplementary material
Source: PubMed Central journal article supplement (PMC2897564)
Supplement: supp_30_14_3421__1.pdf [file supp_30_14_3421__1.pdf]

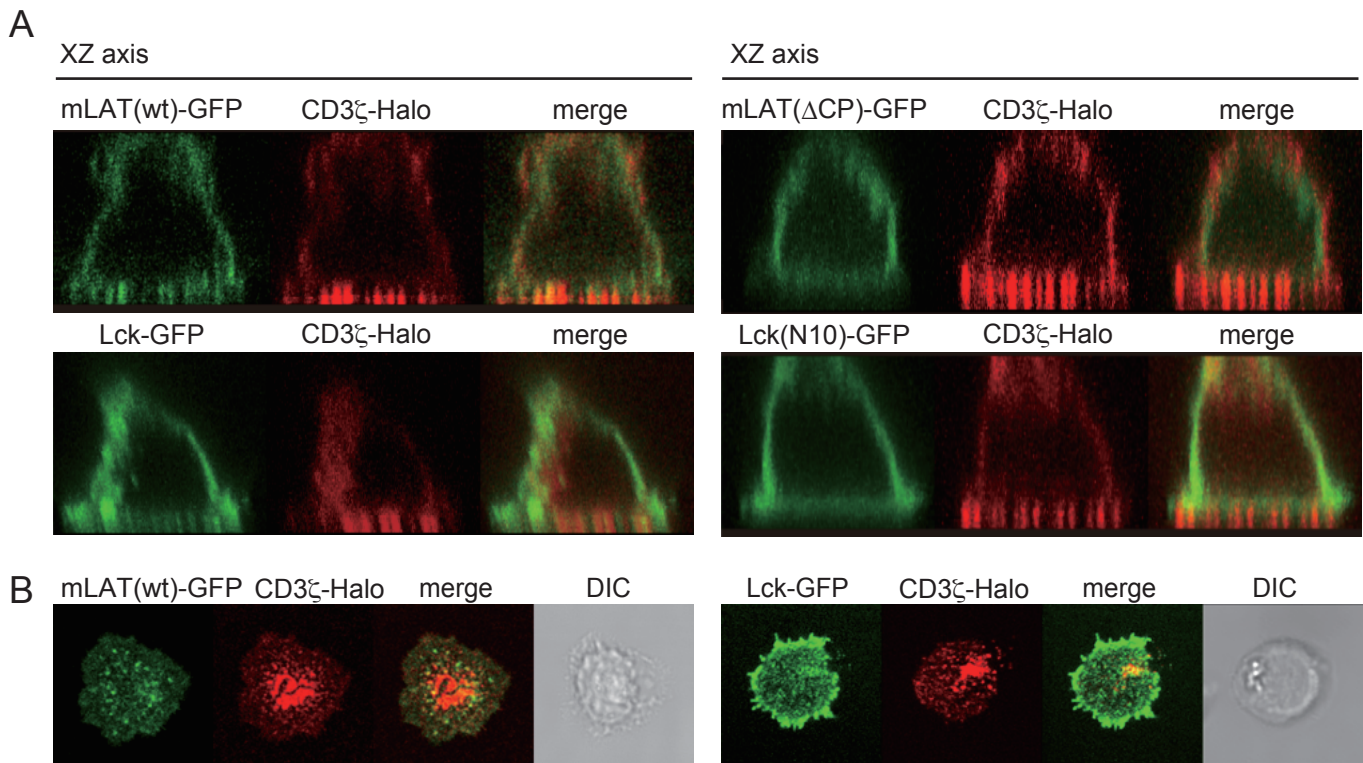

Fig. S1. Supplemental data for lipid raft probes. (A) AND-Tg T cells expressing mLAT(wt)-GFP, mLAT( $\Delta$ CP)-GFP, Lck-GFP or Lck(N10)-GFP and CD3 $\zeta$ -Halo were loaded with TMR-ligand and placed on the bilayer. x-z images collected at 2 minutes after attachment were reconstituted from x-y images acquired at various serial depths (z). (B) AND-Tg T cells expressing mLAT(wt)-GFP or Lck-GFP and CD3 $\zeta$ -Halo were loaded with TMR-ligand and placed on the bilayer for 10 min.
