# Supplementary material
Source: PubMed Central journal article supplement (PMC2897564)
Supplement: supp_30_14_3421__3.pdf [file supp_30_14_3421__3.pdf]

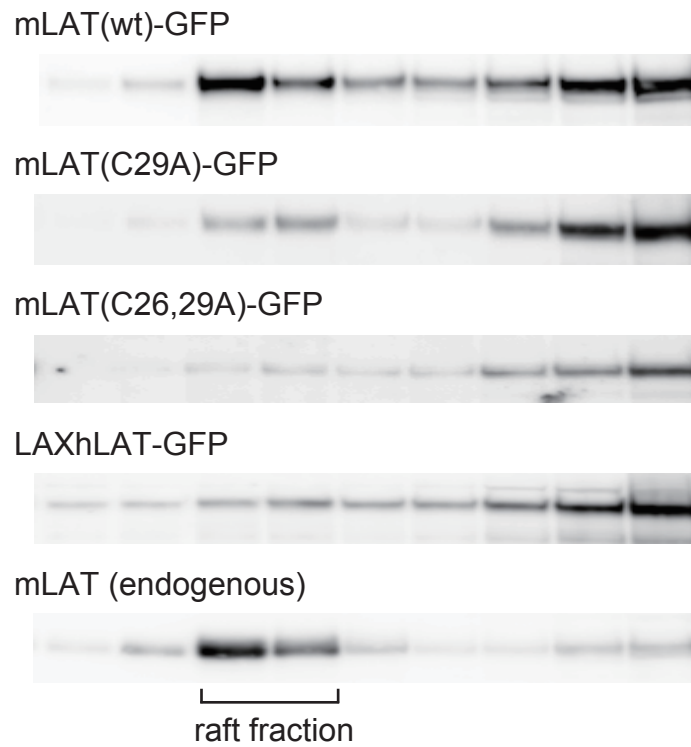

Fig. S3. Fractionation of the LAT mutants expressed in AND-Tg T cell hybridoma cells in the lipid raft fraction AND-TCR hybridoma cells expressing mLAT(wt)-GFP, mLAT(C29A)-GFP, mLAT(C26,29A)-GFP or LAXhLAT-GFP were lysed and fractionated by sucrose gradient ultracentrifugation and the fractions were blotted with anti-LAT. Fractions 3 and 4 correspond to lipid raft-associated proteins.
