# Supplementary material
Source: PubMed Central journal article supplement (PMC2897564)
Supplement: supp_30_14_3421__4.pdf [file supp_30_14_3421__4.pdf]

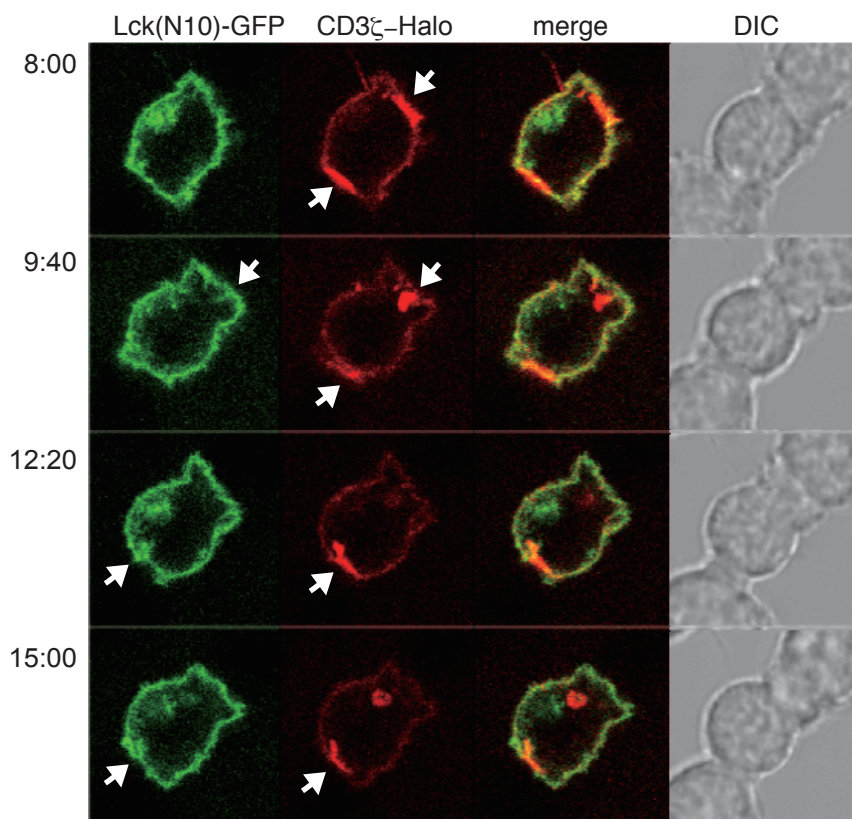

Fig. S4. Images of Lck(N10)-GFP and CD3 $\zeta$  during the interaction of T cells with APC. AND-Tg T cells expressing Lck(N10)-GFP and CD3 $\zeta$ -Halo were loaded with TMR-ligand and incubated with 5  $\mu$ M MCC-peptide-loaded LPS-activated B cells. Video images of cells showing CD3 $\zeta$  accumulation were collected eight minutes after starting the incubation. Images taken at each time point revealed a different time course of CD3 $\zeta$ -Halo and Lck(N10)-GFP accumulation. White arrows indicate accumulation of each molecule.
